# Supplementary material for: Structure-Based Sequence Alignment of the Transmembrane Domains of All Human GPCRs: Phylogenetic, Structural and Functional Implications
Source: PubMed Central journal article supplement (PMC4814114; doi:10.1371/journal.pcbi.1004805), 2016-03-30
Supplement: pcbi.1004805.s001.pdf [file pcbi.1004805.s001.pdf]

| Class      | Ligand     | Protein Name                                    | Short        | Gene    | PDB Id   | PDB Id | Uniprot | Ref.     |
|------------|------------|-------------------------------------------------|--------------|---------|----------|--------|---------|----------|
|            |            |                                                 |              |         | Inactive | Active |         |          |
| A $\alpha$ | opsin      | bovine rhodopsin                                | RHO          | RHO     | 1GZM.A   | 3PQR.A | P08100  | [38, 39] |
| A $\alpha$ | aminergic  | turkey $\beta_1$ adrenergic receptor            | $\beta_1$ AR | ADRB1   | 2VT4.B   |        | P08588  | [46]     |
| A $\alpha$ | aminergic  | human $\beta_2$ adrenergic receptor             | $\beta_2$ AR | ADRB2   | 2RH1.A   | 3SN6.R | P07550  | [6, 40]  |
| A $\alpha$ | aminergic  | human dopamine D3 receptor                      | D3           | DRD3    | 3PBL.A   |        | P35462  | [47]     |
| A $\alpha$ | aminergic  | human histamine H1 receptor                     | H1           | HRH1    | 3RZE.A   |        | P35367  | [48]     |
| A $\alpha$ | aminergic  | human muscarinic acetylcholine receptor M2      | M2           | CHRM2   | 3UON.A   | 4MQS.A | P08172  | [41, 42] |
| A $\alpha$ | aminergic  | rat muscarinic acetylcholine receptor M3        | M3           | CHRM3   | 4DAJ.A   |        | P20309  | [49]     |
| A $\alpha$ | aminergic  | human serotonin receptor 1B                     | 5HT1B        | HTR1B   | 4IAR.A   |        | P28222  | [50]     |
| A $\alpha$ | aminergic  | human serotonin receptor 2B                     | 5HT2B        | HTR2B   | 4NC3.A   |        | P41595  | [51]     |
| A $\alpha$ | nucleoside | human adenosine receptor A2a                    | A2A          | ADORA2A | 3EML.A   | 3QAK.A | P29274  | [43, 44] |
| A $\alpha$ | lipid      | human sphingosine 1-phosphate receptor 1        | S1P1         | S1PR1   | 3V2Y.A   |        | P21453  | [52]     |
| A $\beta$  | peptide    | rat neurotensin receptor type 1                 | NTS1         | NTSR1   |          | 4GRV.A | P30989  | [45]     |
| A $\gamma$ | peptide    | human C-X-C chemokine receptor 4                | CXCR4        | CXCR4   | 3ODU.A   |        | P61073  | [53]     |
| A $\gamma$ | peptide    | human C-C chemokine receptor 5                  | CCR5         | CCR5    | 4MBS.A   |        | P51681  | [54]     |
| A $\gamma$ | peptide    | human $\kappa$ -opioid receptor                 | $\kappa$ OR  | OPRK1   | 4DJH.A   |        | P41145  | [55]     |
| A $\gamma$ | peptide    | mouse $\mu$ -opioid receptor                    | $\mu$ OR     | OPRM1   | 4DKL.A   |        | P35372  | [56]     |
| A $\gamma$ | peptide    | human nociceptin/orphanin FQ opioid receptor    | NOP          | OPRL1   | 4EA3.A   |        | P41146  | [57]     |
| A $\gamma$ | peptide    | mouse $\delta$ -opioid receptor                 | $\delta$ OR  | OPRD1   | 4EJ4.A   |        | P41143  | [58]     |
| A $\delta$ | peptide    | human proteinase-activated receptor 1           | PAR1         | F2R     | 3VW7.A   |        | P25116  | [59]     |
| A $\delta$ | nucleoside | human P2Y purinoreceptor 12                     | P2Y12        | P2RY12  | 4NTJ.A   |        | Q9H244  | [60]     |
| B          | peptide    | human corticotropin-releasing factor receptor 1 | CRF1         | CRHR1   | 4K5Y.B   |        | P34998  | [61]     |
| B          | peptide    | human glucagon receptor                         | GLR          | GCGR    | 4L6R.A   |        | P47871  | [62]     |
| C          | peptide    | human metabotropic glutamate receptor 1         | MGLU1        | GRM1    | 4OR2.A   |        | Q13255  | [63]     |
| C          | peptide    | human metabotropic glutamate receptor 5         | MGLU5        | GRM5    | 4OO9.A   |        | P41594  | [64]     |
| Frizzled   | peptide    | human smoothed homolog                          | SMO          | SMO     | 4N4W.A   |        | Q99835  | [65, 66] |
