# Supplementary material for: Structure-Based Sequence Alignment of the Transmembrane Domains of All Human GPCRs: Phylogenetic, Structural and Functional Implications
Source: PubMed Central journal article supplement (PMC4814114; doi:10.1371/journal.pcbi.1004805), 2016-03-30
Supplement: pcbi.1004805.s004.pdf [file pcbi.1004805.s004.pdf]

|                     | A $\delta$<br>P2Y12                       | A $\delta$<br>P2Y12 | A $\alpha$<br>Beta2AR | A $\beta$<br>NTS1 | A $\gamma$<br>CCR5 | B<br>CRF1 | C<br>MGLU1 | F<br>SMO |
|---------------------|-------------------------------------------|---------------------|-----------------------|-------------------|--------------------|-----------|------------|----------|
| Number of orthologs | 77 (ref. [100])                           | 42                  | 37                    | 21                | 24                 | 72        | 55         | 48       |
|                     | Consensus %                               |                     |                       |                   |                    |           |            |          |
| TM                  | 89.8                                      | 89                  | 91.6                  | 86.4              | 83.8               | 95.6      | 95         | 86.7     |
| CHICO               | 95.1                                      | 93.6                | 97.3                  | 91.1              | 92.1               | 98        | 97.6       | 88.3     |
| NACHO               | 92.7                                      | 91.3                | 98.9                  | 94                | 90.6               | 98.6      | 99.1       | 93.6     |
| CHICO and NACHO     | 97.8                                      | 95.7                | 99.5                  | 89.5              | 97.5               | 99.4      | 98.9       | 93.8     |
|                     | Average conservation (Jalview scale 0-11) |                     |                       |                   |                    |           |            |          |
| TM                  | 8.9                                       | 9.1                 | 9.5                   | 8.4               | 7.8                | 9.8       | 9.8        | 8.8      |
| CHICO               | 9.8                                       | 9.9                 | 10.5                  | 9.3               | 9.5                | 10.3      | 9.9        | 9.2      |
| NACHO               | 9.7                                       | 9.8                 | 10.8                  | 9.1               | 9.2                | 10.4      | 10.4       | 9.8      |
| CHICO and NACHO     | 10.4                                      | 10.4                | 10.8                  | 9.8               | 10.6               | 10.6      | 10.4       | 10       |
