# Supplementary material for: Structure-Based Sequence Alignment of the Transmembrane Domains of All Human GPCRs: Phylogenetic, Structural and Functional Implications
Source: PubMed Central journal article supplement (PMC4814114; doi:10.1371/journal.pcbi.1004805), 2016-03-30
Supplement: pcbi.1004805.s005.pdf [file pcbi.1004805.s005.pdf]

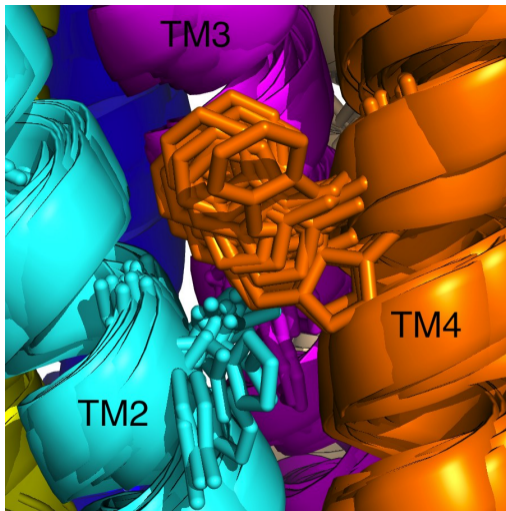

(a) W4.50  $\leftrightarrow$  S/N/T2.45  $\leftrightarrow$  S/N/T3.42

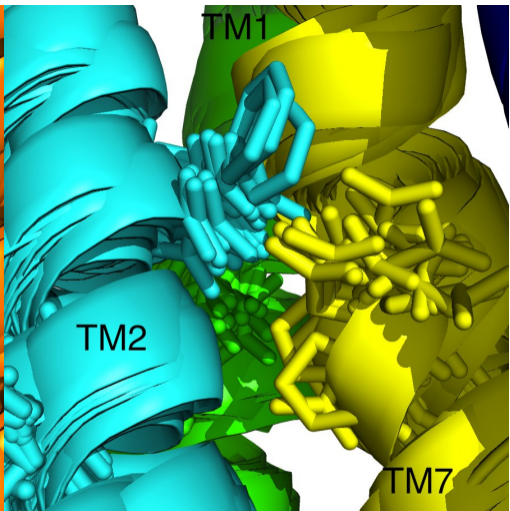

(b) N1.50  $\leftrightarrow$  D2.50  $\leftrightarrow$  N7.49 (water-mediated)
