# Supplementary material for: Structure-Based Sequence Alignment of the Transmembrane Domains of All Human GPCRs: Phylogenetic, Structural and Functional Implications
Source: PubMed Central journal article supplement (PMC4814114; doi:10.1371/journal.pcbi.1004805), 2016-03-30
Supplement: pcbi.1004805.s006.pdf [file pcbi.1004805.s006.pdf]

|            | Cluster A |        |         |         |            | Cluster B |       |       |       |       | Cluster C |       |       |        |       | Cluster D |       |       |         |       | Cluster E |         |       |       |       |       |       |       |       |
|------------|-----------|--------|---------|---------|------------|-----------|-------|-------|-------|-------|-----------|-------|-------|--------|-------|-----------|-------|-------|---------|-------|-----------|---------|-------|-------|-------|-------|-------|-------|-------|
|            | RHO       | RHOact | Beta1AR | Beta2AR | Beta2ARact | D3        | H1    | M2    | M2act | M3    | 5HT1B     | 5HT2B | A2A   | A2Aact | S1P1  | NTS1act   | CXCR4 | CCR5  | KappaOR | MuOR  | NOP       | DeltaOR | PAR1  | P2Y12 | CRF1  | GLR   | MGLU1 | MGLU5 | SMO   |
| RHO        | 100.0     | 100.0  | 42.9    | 44.5    | 44.5       | 46.7      | 44.2  | 42.9  | 43.8  | 42.0  | 46.0      | 45.0  | 46.0  | 45.3   | 40.0  | 44.9      | 40.4  | 45.8  | 46.8    | 47.8  | 40.9      | 44.9    | 38.4  | 35.0  | 31.6  | 32.1  | 27.3  | 25.8  | 25.1  |
| RHOact     | 100.0     | 100.0  | 43.3    | 44.1    | 43.7       | 47.2      | 44.2  | 42.9  | 43.6  | 42.0  | 46.0      | 45.1  | 46.0  | 45.1   | 40.3  | 44.4      | 40.2  | 45.3  | 45.7    | 47.3  | 40.6      | 44.4    | 38.9  | 34.3  | 30.9  | 31.0  | 27.4  | 26.0  | 24.9  |
| Beta1AR    | 42.9      | 43.3   | 100.0   | 82.8    | 82.8       | 61.7      | 62.2  | 55.6  | 55.0  | 56.7  | 61.8      | 58.0  | 54.4  | 53.8   | 48.7  | 48.5      | 50.5  | 48.2  | 52.7    | 49.7  | 52.3      | 52.8    | 45.7  | 45.1  | 31.0  | 34.4  | 26.1  | 24.7  | 29.3  |
| Beta2AR    | 44.5      | 44.1   | 82.8    | 100.0   | 99.5       | 62.4      | 62.4  | 56.1  | 55.9  | 57.9  | 63.7      | 58.9  | 51.0  | 50.5   | 49.2  | 46.0      | 49.2  | 47.5  | 50.5    | 49.3  | 48.8      | 50.5    | 44.3  | 43.1  | 28.6  | 31.8  | 22.7  | 24.2  | 24.9  |
| Beta2ARact | 44.5      | 43.7   | 82.8    | 99.5    | 100.0      | 62.9      | 62.4  | 56.3  | 55.7  | 57.2  | 64.5      | 58.6  | 51.0  | 50.5   | 49.2  | 45.7      | 48.7  | 47.2  | 49.3    | 49.0  | 48.3      | 50.8    | 43.8  | 43.2  | 29.0  | 32.7  | 22.9  | 24.3  | 24.5  |
| D3         | 46.7      | 47.2   | 61.7    | 62.4    | 62.9       | 100.0     | 59.0  | 52.8  | 53.8  | 55.6  | 63.6      | 61.9  | 51.5  | 51.3   | 47.9  | 49.5      | 47.4  | 44.7  | 50.0    | 50.8  | 48.0      | 50.3    | 42.9  | 41.1  | 29.5  | 29.6  | 26.1  | 25.3  | 23.9  |
| H1         | 44.2      | 44.2   | 62.2    | 62.4    | 62.4       | 59.0      | 100.0 | 57.0  | 57.4  | 57.4  | 59.9      | 59.0  | 49.2  | 49.7   | 45.2  | 46.8      | 46.4  | 45.6  | 53.6    | 52.6  | 52.0      | 53.1    | 49.0  | 42.3  | 30.6  | 36.0  | 27.3  | 27.0  | 30.2  |
| M2         | 42.9      | 42.9   | 55.6    | 56.1    | 56.3       | 52.8      | 57.0  | 100.0 | 100.0 | 85.4  | 56.3      | 53.8  | 50.8  | 50.8   | 47.9  | 48.5      | 44.1  | 45.7  | 51.0    | 49.0  | 48.0      | 51.0    | 43.4  | 39.7  | 28.1  | 29.5  | 29.2  | 29.4  | 26.7  |
| M2act      | 43.8      | 43.6   | 55.0    | 55.9    | 55.7       | 53.8      | 57.4  | 100.0 | 100.0 | 85.6  | 55.8      | 54.0  | 51.3  | 50.7   | 46.9  | 48.5      | 44.7  | 45.0  | 50.5    | 48.5  | 47.5      | 50.8    | 44.1  | 39.5  | 28.9  | 29.4  | 29.4  | 29.6  | 26.8  |
| M3         | 42.0      | 42.0   | 56.7    | 57.9    | 57.2       | 55.6      | 57.4  | 85.4  | 85.6  | 100.0 | 53.6      | 53.9  | 50.8  | 50.5   | 45.7  | 48.9      | 44.5  | 45.6  | 50.0    | 47.2  | 45.9      | 48.7    | 46.4  | 39.6  | 30.2  | 27.5  | 29.9  | 30.1  | 27.9  |
| 5HT1B      | 46.0      | 46.0   | 61.8    | 63.7    | 64.5       | 63.6      | 59.9  | 56.3  | 55.8  | 53.6  | 100.0     | 59.9  | 50.3  | 49.5   | 49.7  | 49.0      | 46.1  | 40.0  | 53.2    | 50.3  | 47.2      | 51.0    | 40.4  | 39.2  | 29.1  | 33.7  | 23.3  | 25.3  | 25.3  |
| 5HT2B      | 45.0      | 45.1   | 58.0    | 58.9    | 58.6       | 61.9      | 59.0  | 53.8  | 54.0  | 53.9  | 59.9      | 100.0 | 49.5  | 49.5   | 48.2  | 45.3      | 44.8  | 44.4  | 49.5    | 48.8  | 48.6      | 49.5    | 40.8  | 40.6  | 30.9  | 31.1  | 26.7  | 28.1  | 24.1  |
| A2A        | 46.0      | 46.0   | 54.4    | 51.0    | 51.0       | 51.5      | 49.2  | 50.8  | 51.3  | 50.8  | 50.3      | 49.5  | 100.0 | 100.0  | 47.4  | 46.6      | 44.7  | 44.7  | 49.7    | 47.5  | 45.8      | 48.5    | 40.3  | 40.6  | 31.9  | 35.1  | 26.6  | 24.2  | 26.5  |
| A2Aact     | 45.3      | 45.1   | 53.8    | 50.5    | 50.5       | 51.3      | 49.7  | 50.8  | 50.7  | 50.5  | 49.5      | 49.5  | 100.0 | 100.0  | 46.9  | 45.9      | 44.3  | 45.0  | 49.3    | 47.3  | 45.1      | 48.2    | 40.2  | 40.0  | 32.1  | 34.6  | 26.7  | 24.2  | 26.6  |
| S1P1       | 40.0      | 40.3   | 48.7    | 49.2    | 49.2       | 47.9      | 45.2  | 47.9  | 46.9  | 45.7  | 49.7      | 48.2  | 47.4  | 46.9   | 100.0 | 41.9      | 42.3  | 43.3  | 46.4    | 44.8  | 43.3      | 44.4    | 39.2  | 39.5  | 29.1  | 29.3  | 28.2  | 27.4  | 25.4  |
| NTS1act    | 44.9      | 44.4   | 48.5    | 46.0    | 45.7       | 49.5      | 46.8  | 48.5  | 48.5  | 48.9  | 49.0      | 45.3  | 46.6  | 45.9   | 41.9  | 100.0     | 47.5  | 40.7  | 49.3    | 48.5  | 49.3      | 49.0    | 43.3  | 41.5  | 24.2  | 26.4  | 21.8  | 18.8  | 21.7  |
| CXCR4      | 40.4      | 40.2   | 50.5    | 49.2    | 48.7       | 47.4      | 46.4  | 44.1  | 44.7  | 44.5  | 46.1      | 44.8  | 44.7  | 44.3   | 42.3  | 47.5      | 100.0 | 62.3  | 55.9    | 53.4  | 53.9      | 54.5    | 48.5  | 50.0  | 31.7  | 32.6  | 21.7  | 22.6  | 25.0  |
| CCR5       | 45.8      | 45.3   | 48.2    | 47.5    | 47.2       | 44.7      | 45.6  | 45.7  | 45.0  | 45.6  | 40.0      | 44.4  | 44.7  | 45.0   | 43.3  | 40.7      | 62.3  | 100.0 | 57.8    | 55.6  | 52.2      | 55.1    | 52.2  | 51.2  | 33.7  | 34.2  | 24.9  | 22.9  | 28.4  |
| KappaOR    | 46.8      | 45.7   | 52.7    | 50.5    | 49.3       | 50.0      | 53.6  | 51.0  | 50.5  | 50.0  | 53.2      | 49.5  | 49.7  | 49.3   | 46.4  | 49.3      | 55.9  | 57.8  | 100.0   | 86.5  | 76.6      | 84.8    | 52.2  | 49.3  | 35.5  | 33.2  | 24.7  | 23.6  | 29.2  |
| MuOR       | 47.8      | 47.3   | 49.7    | 49.3    | 49.0       | 50.8      | 52.6  | 49.0  | 48.5  | 47.2  | 50.3      | 48.8  | 47.5  | 47.3   | 44.8  | 48.5      | 53.4  | 55.6  | 86.5    | 100.0 | 74.8      | 83.1    | 49.0  | 47.5  | 33.5  | 32.8  | 22.0  | 22.9  | 25.9  |
| NOP        | 40.9      | 40.6   | 52.3    | 48.8    | 48.3       | 48.0      | 52.0  | 48.0  | 47.5  | 45.9  | 47.2      | 48.6  | 45.8  | 45.1   | 43.3  | 49.3      | 53.9  | 52.2  | 76.6    | 74.8  | 100.0     | 73.9    | 50.7  | 46.1  | 31.9  | 32.2  | 23.7  | 22.9  | 25.4  |
| DeltaOR    | 44.9      | 44.4   | 52.8    | 50.5    | 50.8       | 50.3      | 53.1  | 51.0  | 50.8  | 48.7  | 51.0      | 49.5  | 48.5  | 48.2   | 44.4  | 49.0      | 54.5  | 55.1  | 84.8    | 83.1  | 73.9      | 100.0   | 51.5  | 44.6  | 32.8  | 33.0  | 24.2  | 24.4  | 28.7  |
| PAR1       | 38.4      | 38.9   | 45.7    | 44.3    | 43.8       | 42.9      | 49.0  | 43.4  | 44.1  | 46.4  | 40.4      | 40.8  | 40.3  | 40.2   | 39.2  | 43.3      | 48.5  | 52.2  | 52.2    | 49.0  | 50.7      | 51.5    | 100.0 | 48.5  | 32.8  | 32.7  | 23.7  | 22.3  | 27.5  |
| P2Y12      | 35.0      | 34.3   | 45.1    | 43.1    | 43.2       | 41.1      | 42.3  | 39.7  | 39.5  | 39.6  | 39.2      | 40.6  | 40.6  | 40.0   | 39.5  | 41.5      | 50.0  | 51.2  | 49.3    | 47.5  | 46.1      | 44.6    | 48.5  | 100.0 | 35.0  | 33.0  | 29.1  | 27.1  | 27.2  |
| CRF1       | 31.6      | 30.9   | 31.0    | 28.6    | 29.0       | 29.5      | 30.6  | 28.1  | 28.9  | 30.2  | 29.1      | 30.9  | 31.9  | 32.1   | 29.1  | 24.2      | 31.7  | 33.7  | 35.5    | 33.5  | 31.9      | 32.8    | 32.8  | 35.0  | 100.0 | 58.0  | 28.4  | 29.8  | 33.0  |
| GLR        | 32.1      | 31.0   | 34.4    | 31.8    | 32.7       | 29.6      | 36.0  | 29.5  | 29.4  | 27.5  | 33.7      | 31.1  | 35.1  | 34.6   | 29.3  | 26.4      | 32.6  | 34.2  | 33.2    | 32.8  | 32.2      | 33.0    | 32.7  | 33.0  | 58.0  | 100.0 | 25.6  | 26.9  | 30.6  |
| MGLU1      | 27.3      | 27.4   | 26.1    | 22.7    | 22.9       | 26.1      | 27.3  | 29.2  | 29.4  | 29.9  | 23.3      | 26.7  | 26.6  | 26.7   | 28.2  | 21.8      | 21.7  | 24.9  | 24.7    | 22.0  | 23.7      | 24.2    | 23.7  | 29.1  | 28.4  | 25.6  | 100.0 | 85.9  | 31.0  |
| MGLU5      | 25.8      | 26.0   | 24.7    | 24.2    | 24.3       | 25.3      | 27.0  | 29.4  | 29.6  | 30.1  | 25.3      | 28.1  | 24.2  | 24.2   | 27.4  | 18.8      | 22.6  | 22.9  | 23.6    | 22.9  | 22.9      | 24.4    | 22.3  | 27.1  | 29.8  | 26.9  | 85.9  | 100.0 | 28.9  |
| SMO        | 25.1      | 24.9   | 29.3    | 24.9    | 24.5       | 23.9      | 30.2  | 26.7  | 26.8  | 27.9  | 25.3      | 24.1  | 26.5  | 26.6   | 25.4  | 21.7      | 25.0  | 28.4  | 29.2    | 25.9  | 25.4      | 28.7    | 27.5  | 27.2  | 33.0  | 30.6  | 31.0  | 28.9  | 100.0 |
