# Supplementary material for: Structure-Based Sequence Alignment of the Transmembrane Domains of All Human GPCRs: Phylogenetic, Structural and Functional Implications
Source: PubMed Central journal article supplement (PMC4814114; doi:10.1371/journal.pcbi.1004805), 2016-03-30
Supplement: pcbi.1004805.s007.pdf [file pcbi.1004805.s007.pdf]

|            | RHO  | RHOact | Beta1AR | Beta2AR | Beta2ARact | D3   | H1   | M2   | M2act | M3   | 5HT1B | 5HT2B | A2A  | A2Aact | S1P1 | NTS1act | CXCR4 | CCR5 | KappaOR | MuOR | NOP  | DeltaOR | PAR1 | P2Y12 | CRF1 | GLR  | MGLU1 | MGLU5 | SMO  |
|------------|------|--------|---------|---------|------------|------|------|------|-------|------|-------|-------|------|--------|------|---------|-------|------|---------|------|------|---------|------|-------|------|------|-------|-------|------|
| RHO        | 0.00 | 2.22   | 2.12    | 2.07    | 3.21       | 1.68 | 1.96 | 2.25 | 2.66  | 2.40 | 2.15  | 2.00  | 2.36 | 2.72   | 2.26 | 2.91    | 2.16  | 2.08 | 2.50    | 1.85 | 1.86 | 1.99    | 2.62 | 2.91  | 3.21 | 2.88 | 3.14  | 3.25  | 3.03 |
| RHOact     | 2.22 | 0.00   | 2.49    | 2.35    | 2.05       | 2.53 | 2.28 | 2.66 | 1.84  | 2.31 | 1.99  | 2.09  | 2.69 | 2.40   | 2.74 | 2.41    | 2.80  | 2.52 | 3.02    | 2.68 | 2.84 | 2.50    | 2.47 | 2.90  | 3.45 | 3.01 | 3.09  | 3.23  | 3.15 |
| Beta1AR    | 2.12 | 2.49   | 0.00    | 0.60    | 2.54       | 1.38 | 1.53 | 1.34 | 2.09  | 1.53 | 1.51  | 1.91  | 1.89 | 2.58   | 1.77 | 2.70    | 2.75  | 2.24 | 2.32    | 2.32 | 2.20 | 2.21    | 2.96 | 3.14  | 3.14 | 2.85 | 2.95  | 3.11  | 3.09 |
| Beta2AR    | 2.07 | 2.35   | 0.60    | 0.00    | 2.45       | 1.36 | 1.38 | 1.40 | 2.01  | 1.42 | 1.35  | 1.83  | 1.86 | 2.48   | 1.86 | 2.52    | 2.64  | 2.26 | 2.16    | 2.26 | 2.10 | 2.09    | 2.86 | 3.08  | 3.06 | 2.70 | 2.89  | 3.06  | 3.09 |
| Beta2ARact | 3.21 | 2.05   | 2.54    | 2.45    | 0.00       | 3.11 | 2.90 | 2.63 | 1.38  | 1.99 | 1.66  | 2.49  | 3.09 | 2.78   | 3.46 | 2.18    | 3.48  | 3.15 | 3.29    | 3.43 | 3.34 | 2.65    | 3.04 | 2.59  | 3.81 | 3.38 | 3.14  | 3.36  | 3.57 |
| D3         | 1.68 | 2.53   | 1.38    | 1.36    | 3.11       | 0.00 | 1.36 | 1.66 | 2.36  | 1.80 | 1.44  | 1.71  | 1.58 | 2.12   | 1.61 | 2.36    | 2.01  | 1.80 | 1.84    | 1.64 | 1.58 | 1.70    | 2.75 | 2.79  | 2.63 | 2.54 | 2.79  | 2.91  | 2.44 |
| H1         | 1.96 | 2.28   | 1.53    | 1.38    | 2.90       | 1.36 | 0.00 | 1.48 | 2.19  | 1.35 | 1.44  | 1.75  | 1.94 | 2.35   | 1.87 | 2.43    | 2.12  | 1.79 | 1.83    | 1.79 | 1.71 | 1.69    | 2.65 | 2.76  | 2.81 | 2.67 | 2.89  | 2.98  | 2.56 |
| M2         | 2.25 | 2.66   | 1.34    | 1.40    | 2.63       | 1.66 | 1.48 | 0.00 | 2.23  | 1.10 | 1.96  | 2.12  | 2.06 | 2.72   | 1.95 | 2.96    | 2.52  | 2.13 | 2.19    | 2.12 | 2.06 | 2.08    | 3.26 | 3.16  | 3.16 | 3.06 | 3.04  | 3.19  | 2.97 |
| M2act      | 2.66 | 1.84   | 2.09    | 2.01    | 1.38       | 2.36 | 2.19 | 2.23 | 0.00  | 1.72 | 1.31  | 1.89  | 2.44 | 2.14   | 2.68 | 2.02    | 3.12  | 2.88 | 2.82    | 2.89 | 2.72 | 2.55    | 2.83 | 2.87  | 3.15 | 3.19 | 2.89  | 3.09  | 3.40 |
| M3         | 2.40 | 2.31   | 1.53    | 1.42    | 1.99       | 1.80 | 1.35 | 1.10 | 1.72  | 0.00 | 1.77  | 1.99  | 2.03 | 2.48   | 1.97 | 2.62    | 2.70  | 2.29 | 2.29    | 2.40 | 2.23 | 2.22    | 3.13 | 3.14  | 3.12 | 3.01 | 2.86  | 3.04  | 3.05 |
| 5HT1B      | 2.15 | 1.99   | 1.51    | 1.35    | 1.66       | 1.44 | 1.44 | 1.96 | 1.31  | 1.77 | 0.00  | 1.64  | 1.92 | 2.01   | 2.15 | 1.99    | 2.59  | 2.37 | 2.33    | 2.35 | 2.21 | 2.24    | 2.68 | 2.97  | 2.83 | 2.76 | 2.75  | 2.90  | 3.03 |
| 5HT2B      | 2.00 | 2.09   | 1.91    | 1.83    | 2.49       | 1.71 | 1.75 | 2.12 | 1.89  | 1.99 | 1.64  | 0.00  | 2.07 | 2.07   | 2.25 | 2.40    | 2.55  | 2.13 | 2.26    | 2.29 | 2.38 | 2.31    | 2.84 | 3.14  | 3.02 | 2.85 | 2.85  | 2.99  | 2.86 |
| A2A        | 2.36 | 2.69   | 1.89    | 1.86    | 3.09       | 1.58 | 1.94 | 2.06 | 2.44  | 2.03 | 1.92  | 2.07  | 0.00 | 1.63   | 1.70 | 2.51    | 2.65  | 2.22 | 2.53    | 2.33 | 2.38 | 2.27    | 3.16 | 3.18  | 3.02 | 3.03 | 2.96  | 3.06  | 3.00 |
| A2Aact     | 2.72 | 2.40   | 2.58    | 2.48    | 2.78       | 2.12 | 2.35 | 2.72 | 2.14  | 2.48 | 2.01  | 2.07  | 1.63 | 0.00   | 2.34 | 2.08    | 2.98  | 2.79 | 3.07    | 2.83 | 2.85 | 2.75    | 3.06 | 3.10  | 2.81 | 3.07 | 3.00  | 3.15  | 3.11 |
| S1P1       | 2.26 | 2.74   | 1.77    | 1.86    | 3.46       | 1.61 | 1.87 | 1.95 | 2.68  | 1.97 | 2.15  | 2.25  | 1.70 | 2.34   | 0.00 | 3.02    | 2.60  | 2.12 | 2.74    | 2.24 | 2.15 | 2.28    | 3.07 | 3.19  | 2.76 | 2.90 | 2.74  | 2.83  | 2.81 |
| NTS1act    | 2.91 | 2.41   | 2.70    | 2.52    | 2.18       | 2.36 | 2.43 | 2.96 | 2.02  | 2.62 | 1.99  | 2.40  | 2.51 | 2.08   | 3.02 | 0.00    | 2.89  | 3.06 | 2.63    | 2.82 | 2.67 | 2.52    | 2.43 | 2.83  | 2.99 | 2.90 | 3.00  | 3.19  | 3.31 |
| CXCR4      | 2.16 | 2.80   | 2.75    | 2.64    | 3.48       | 2.01 | 2.12 | 2.52 | 3.12  | 2.70 | 2.59  | 2.55  | 2.65 | 2.98   | 2.60 | 2.89    | 0.00  | 1.79 | 2.32    | 1.78 | 1.97 | 1.87    | 2.89 | 2.81  | 3.13 | 2.93 | 3.14  | 3.25  | 2.52 |
| CCR5       | 2.08 | 2.52   | 2.24    | 2.26    | 3.15       | 1.80 | 1.79 | 2.13 | 2.88  | 2.29 | 2.37  | 2.13  | 2.22 | 2.79   | 2.12 | 3.06    | 1.79  | 0.00 | 2.41    | 1.74 | 1.83 | 1.79    | 2.75 | 3.16  | 3.24 | 3.04 | 3.12  | 3.20  | 2.80 |
| KappaOR    | 2.50 | 3.02   | 2.32    | 2.16    | 3.29       | 1.84 | 1.83 | 2.19 | 2.82  | 2.29 | 2.33  | 2.26  | 2.53 | 3.07   | 2.74 | 2.63    | 2.32  | 2.41 | 0.00    | 1.41 | 1.59 | 1.45    | 2.80 | 3.46  | 3.25 | 2.88 | 3.16  | 3.38  | 3.25 |
| MuOR       | 1.85 | 2.68   | 2.32    | 2.26    | 3.43       | 1.64 | 1.79 | 2.12 | 2.89  | 2.40 | 2.35  | 2.29  | 2.33 | 2.83   | 2.24 | 2.82    | 1.78  | 1.74 | 1.41    | 0.00 | 1.02 | 0.84    | 2.77 | 2.91  | 2.96 | 2.64 | 3.11  | 3.27  | 2.66 |
| NOP        | 1.86 | 2.84   | 2.20    | 2.10    | 3.34       | 1.58 | 1.71 | 2.06 | 2.72  | 2.23 | 2.21  | 2.38  | 2.38 | 2.85   | 2.15 | 2.67    | 1.97  | 1.83 | 1.59    | 1.02 | 0.00 | 1.09    | 2.59 | 3.24  | 2.99 | 2.73 | 3.06  | 3.20  | 2.82 |
| DeltaOR    | 1.99 | 2.50   | 2.21    | 2.09    | 2.65       | 1.70 | 1.69 | 2.08 | 2.55  | 2.22 | 2.24  | 2.31  | 2.27 | 2.75   | 2.28 | 2.52    | 1.87  | 1.79 | 1.45    | 0.84 | 1.09 | 0.00    | 2.52 | 2.67  | 3.09 | 2.75 | 3.12  | 3.32  | 2.70 |
| PAR1       | 2.62 | 2.47   | 2.96    | 2.86    | 3.04       | 2.75 | 2.65 | 3.26 | 2.83  | 3.13 | 2.68  | 2.84  | 3.16 | 3.06   | 3.07 | 2.43    | 2.89  | 2.75 | 2.80    | 2.77 | 2.59 | 2.52    | 0.00 | 2.23  | 3.59 | 3.35 | 3.43  | 3.66  | 3.52 |
| P2Y12      | 2.91 | 2.90   | 3.14    | 3.08    | 2.59       | 2.79 | 2.76 | 3.16 | 2.87  | 3.14 | 2.97  | 3.14  | 3.18 | 3.10   | 3.19 | 2.83    | 2.81  | 3.16 | 3.46    | 2.91 | 3.24 | 2.67    | 2.23 | 0.00  | 3.43 | 3.24 | 3.27  | 3.52  | 3.31 |
| CRF1       | 3.21 | 3.45   | 3.14    | 3.06    | 3.81       | 2.63 | 2.81 | 3.16 | 3.15  | 3.12 | 2.83  | 3.02  | 3.02 | 2.81   | 2.76 | 2.99    | 3.13  | 3.24 | 3.25    | 2.96 | 2.99 | 3.09    | 3.59 | 3.43  | 0.00 | 2.42 | 3.17  | 3.17  | 2.87 |
| GLR        | 2.88 | 3.01   | 2.85    | 2.70    | 3.38       | 2.54 | 2.67 | 3.06 | 3.19  | 3.01 | 2.76  | 2.85  | 3.03 | 3.07   | 2.90 | 2.90    | 2.93  | 3.04 | 2.88    | 2.64 | 2.73 | 2.75    | 3.35 | 3.24  | 2.42 | 0.00 | 2.85  | 2.94  | 2.52 |
| MGLU1      | 3.14 | 3.09   | 2.95    | 2.89    | 3.14       | 2.79 | 2.89 | 3.04 | 2.89  | 2.86 | 2.75  | 2.85  | 2.96 | 3.00   | 2.74 | 3.00    | 3.14  | 3.12 | 3.16    | 3.11 | 3.06 | 3.12    | 3.43 | 3.27  | 3.17 | 2.85 | 0.00  | 0.73  | 3.10 |
| MGLU5      | 3.25 | 3.23   | 3.11    | 3.06    | 3.36       | 2.91 | 2.98 | 3.19 | 3.09  | 3.04 | 2.90  | 2.99  | 3.06 | 3.15   | 2.83 | 3.19    | 3.25  | 3.20 | 3.38    | 3.27 | 3.20 | 3.32    | 3.66 | 3.52  | 3.17 | 2.94 | 0.73  | 0.00  | 3.13 |
| SMO        | 3.03 | 3.15   | 3.09    | 3.09    | 3.57       | 2.44 | 2.56 | 2.97 | 3.40  | 3.05 | 3.03  | 2.86  | 3.00 | 3.11   | 2.81 | 3.31    | 2.52  | 2.80 | 3.25    | 2.66 | 2.82 | 2.70    | 3.52 | 3.31  | 2.87 | 2.52 | 3.10  | 3.13  | 0.00 |
