# Supplementary material for: Structure-Based Sequence Alignment of the Transmembrane Domains of All Human GPCRs: Phylogenetic, Structural and Functional Implications
Source: PubMed Central journal article supplement (PMC4814114; doi:10.1371/journal.pcbi.1004805), 2016-03-30
Supplement: pcbi.1004805.s011.pdf [file pcbi.1004805.s011.pdf]

Uses GPCRtm substitution matrix

| TM  | Vomeronasal similarity to | Offset |      |      |      |      |      |      |      |      |      |      |
|-----|---------------------------|--------|------|------|------|------|------|------|------|------|------|------|
|     |                           | -5     | -4   | -3   | -2   | -1   | 0    | 1    | 2    | 3    | 4    | 5    |
| TM1 | A-alpha                   | 0.21   | 0.20 | 0.26 | 0.24 | 0.25 | 0.32 | 0.23 | 0.22 | 0.24 | 0.24 | 0.24 |
|     | A-beta                    | 0.21   | 0.19 | 0.25 | 0.26 | 0.24 | 0.32 | 0.23 | 0.23 | 0.27 | 0.22 | 0.24 |
|     | A-gamma                   | 0.20   | 0.19 | 0.25 | 0.25 | 0.23 | 0.34 | 0.23 | 0.19 | 0.24 | 0.21 | 0.22 |
|     | A-delta                   | 0.21   | 0.19 | 0.25 | 0.24 | 0.22 | 0.33 | 0.22 | 0.22 | 0.23 | 0.21 | 0.22 |
|     | B                         | 0.20   | 0.24 | 0.27 | 0.28 | 0.24 | 0.26 | 0.24 | 0.26 | 0.31 | 0.26 | 0.25 |
|     | C                         | 0.26   | 0.19 | 0.28 | 0.24 | 0.20 | 0.32 | 0.29 | 0.25 | 0.28 | 0.26 | 0.25 |
|     | F                         | 0.20   | 0.19 | 0.27 | 0.22 | 0.21 | 0.31 | 0.28 | 0.21 | 0.18 | 0.27 | 0.26 |
| TM2 | A-alpha                   | 0.19   | 0.25 | 0.20 | 0.25 | 0.24 | 0.36 | 0.21 | 0.19 | 0.25 | 0.22 | 0.29 |
|     | A-beta                    | 0.21   | 0.23 | 0.19 | 0.22 | 0.24 | 0.41 | 0.21 | 0.19 | 0.24 | 0.20 | 0.30 |
|     | A-gamma                   | 0.22   | 0.20 | 0.19 | 0.30 | 0.20 | 0.42 | 0.21 | 0.24 | 0.26 | 0.16 | 0.34 |
|     | A-delta                   | 0.19   | 0.18 | 0.21 | 0.30 | 0.20 | 0.39 | 0.20 | 0.23 | 0.24 | 0.16 | 0.32 |
|     | B                         | 0.21   | 0.25 | 0.15 | 0.26 | 0.25 | 0.36 | 0.20 | 0.14 | 0.26 | 0.25 | 0.32 |
|     | C                         | 0.17   | 0.22 | 0.21 | 0.21 | 0.28 | 0.24 | 0.26 | 0.23 | 0.21 | 0.33 | 0.25 |
|     | F                         | 0.16   | 0.26 | 0.16 | 0.19 | 0.16 | 0.27 | 0.21 | 0.21 | 0.26 | 0.22 | 0.25 |
| TM3 | A-alpha                   | 0.20   | 0.21 | 0.22 | 0.21 | 0.18 | 0.37 | 0.17 | 0.24 | 0.19 | 0.17 | 0.17 |
|     | A-beta                    | 0.15   | 0.25 | 0.22 | 0.22 | 0.19 | 0.41 | 0.20 | 0.23 | 0.21 | 0.16 | 0.16 |
|     | A-gamma                   | 0.12   | 0.21 | 0.22 | 0.18 | 0.15 | 0.38 | 0.20 | 0.22 | 0.25 | 0.16 | 0.18 |
|     | A-delta                   | 0.15   | 0.20 | 0.22 | 0.18 | 0.15 | 0.35 | 0.19 | 0.24 | 0.24 | 0.17 | 0.18 |
|     | B                         | 0.12   | 0.22 | 0.19 | 0.17 | 0.18 | 0.25 | 0.19 | 0.23 | 0.17 | 0.23 | 0.23 |
|     | C                         | 0.18   | 0.27 | 0.15 | 0.27 | 0.22 | 0.25 | 0.14 | 0.24 | 0.18 | 0.20 | 0.21 |
|     | F                         | 0.14   | 0.20 | 0.22 | 0.14 | 0.22 | 0.31 | 0.23 | 0.23 | 0.21 | 0.22 | 0.20 |
| TM4 | A-alpha                   | 0.21   | 0.19 | 0.20 | 0.22 | 0.25 | 0.30 | 0.18 | 0.20 | 0.19 | 0.23 | 0.16 |
|     | A-beta                    | 0.22   | 0.19 | 0.20 | 0.22 | 0.22 | 0.26 | 0.19 | 0.23 | 0.21 | 0.24 | 0.16 |
|     | A-gamma                   | 0.19   | 0.20 | 0.24 | 0.21 | 0.21 | 0.29 | 0.19 | 0.22 | 0.23 | 0.19 | 0.15 |
|     | A-delta                   | 0.19   | 0.19 | 0.25 | 0.22 | 0.24 | 0.28 | 0.19 | 0.21 | 0.21 | 0.20 | 0.16 |
|     | B                         | 0.18   | 0.17 | 0.18 | 0.18 | 0.18 | 0.27 | 0.24 | 0.16 | 0.17 | 0.22 | 0.16 |
|     | C                         | 0.25   | 0.27 | 0.23 | 0.23 | 0.22 | 0.26 | 0.27 | 0.24 | 0.26 | 0.22 | 0.20 |
|     | F                         | 0.12   | 0.22 | 0.20 | 0.17 | 0.23 | 0.30 | 0.21 | 0.17 | 0.17 | 0.25 | 0.21 |
| TM5 | A-alpha                   | 0.19   | 0.22 | 0.21 | 0.21 | 0.27 | 0.25 | 0.21 | 0.26 | 0.21 | 0.22 | 0.20 |
|     | A-beta                    | 0.23   | 0.22 | 0.24 | 0.21 | 0.26 | 0.29 | 0.19 | 0.25 | 0.22 | 0.23 | 0.20 |
|     | A-gamma                   | 0.21   | 0.25 | 0.22 | 0.21 | 0.24 | 0.28 | 0.21 | 0.25 | 0.22 | 0.21 | 0.20 |
|     | A-delta                   | 0.20   | 0.23 | 0.24 | 0.22 | 0.24 | 0.29 | 0.22 | 0.22 | 0.19 | 0.24 | 0.19 |
|     | B                         | 0.21   | 0.21 | 0.22 | 0.24 | 0.20 | 0.27 | 0.24 | 0.22 | 0.19 | 0.23 | 0.25 |
|     | C                         | 0.27   | 0.26 | 0.22 | 0.26 | 0.24 | 0.25 | 0.28 | 0.24 | 0.24 | 0.19 | 0.15 |
|     | F                         | 0.24   | 0.25 | 0.24 | 0.26 | 0.14 | 0.22 | 0.26 | 0.26 | 0.25 | 0.30 | 0.23 |
| TM6 | A-alpha                   | 0.23   | 0.26 | 0.28 | 0.24 | 0.26 | 0.40 | 0.23 | 0.22 | 0.25 | 0.22 | 0.20 |
|     | A-beta                    | 0.22   | 0.28 | 0.26 | 0.23 | 0.25 | 0.36 | 0.22 | 0.18 | 0.24 | 0.21 | 0.18 |
|     | A-gamma                   | 0.23   | 0.29 | 0.30 | 0.23 | 0.26 | 0.37 | 0.24 | 0.20 | 0.26 | 0.21 | 0.18 |
|     | A-delta                   | 0.24   | 0.27 | 0.29 | 0.23 | 0.25 | 0.34 | 0.23 | 0.21 | 0.25 | 0.22 | 0.21 |
|     | B                         | 0.22   | 0.22 | 0.22 | 0.24 | 0.20 | 0.38 | 0.29 | 0.21 | 0.34 | 0.28 | 0.23 |
|     | C                         | 0.21   | 0.24 | 0.21 | 0.29 | 0.20 | 0.26 | 0.27 | 0.23 | 0.20 | 0.27 | 0.22 |
|     | F                         | 0.24   | 0.32 | 0.28 | 0.20 | 0.22 | 0.23 | 0.19 | 0.23 | 0.19 | 0.22 | 0.24 |
| TM7 | A-alpha                   | 0.19   | 0.17 | 0.18 | 0.20 | 0.22 | 0.27 | 0.17 | 0.18 | 0.17 | 0.22 | 0.16 |
|     | A-beta                    | 0.17   | 0.21 | 0.19 | 0.20 | 0.25 | 0.27 | 0.17 | 0.21 | 0.23 | 0.20 | 0.13 |
|     | A-gamma                   | 0.20   | 0.20 | 0.21 | 0.22 | 0.22 | 0.26 | 0.19 | 0.22 | 0.21 | 0.21 | 0.14 |
|     | A-delta                   | 0.18   | 0.22 | 0.20 | 0.19 | 0.23 | 0.25 | 0.18 | 0.21 | 0.21 | 0.24 | 0.14 |
|     | B                         | 0.19   | 0.17 | 0.21 | 0.17 | 0.25 | 0.20 | 0.22 | 0.19 | 0.19 | 0.19 | 0.13 |
|     | C                         | 0.17   | 0.25 | 0.23 | 0.26 | 0.25 | 0.23 | 0.22 | 0.27 | 0.23 | 0.23 | 0.19 |
|     | F                         | 0.24   | 0.18 | 0.17 | 0.12 | 0.25 | 0.21 | 0.22 | 0.21 | 0.25 | 0.20 | 0.16 |
