# Supplementary material for: Structure-Based Sequence Alignment of the Transmembrane Domains of All Human GPCRs: Phylogenetic, Structural and Functional Implications
Source: PubMed Central journal article supplement (PMC4814114; doi:10.1371/journal.pcbi.1004805), 2016-03-30
Supplement: pcbi.1004805.s013.pdf [file pcbi.1004805.s013.pdf]

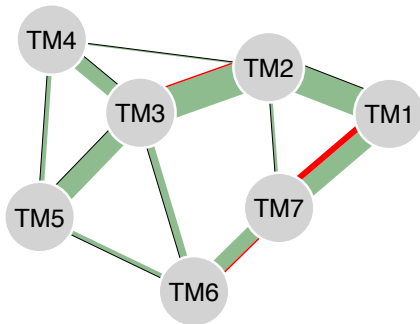

TM2-TM3: 2.63-3.25  
 TM6-TM7: 6.47-7.38  
 TM1-TM7: 1.43-7.42, 1.46-7.44, 1.50-7.49, 1.56-7.54

(a) Class B: CRF1, GLR

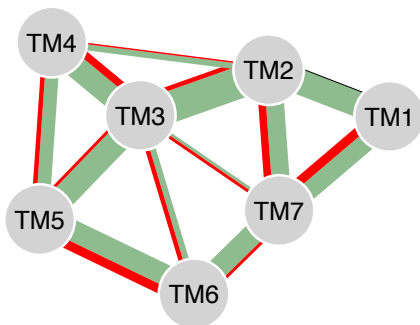

TM2-TM3: 2.48-3.38, 2.52-3.38, 2.59-3.27  
 TM3-TM4: 3.33-4.53, 3.37-4.50, 3.41-4.46, 3.44-4.49, 3.45-4.42  
 TM3-TM5: 3.33-5.47, 3.37-5.50  
 TM3-TM6: 3.40-6.41, 3.43-6.37, 3.46-6.33  
 TM3-TM7: 3.32-7.38, 3.40-7.45  
 TM2-TM4: 2.42-4.43  
 TM4-TM5: 4.49-5.46, 4.53-5.43, 4.53-5.47  
 TM5-TM6: 5.37-6.56, 5.41-6.56, 5.44-6.48, 5.44-6.51, 5.48-6.48, 5.59-6.42  
 TM6-TM7: 6.55-7.34, 6.55-7.37  
 TM2-TM7: 2.46-7.54, 2.50-7.54, 2.54-7.43, 2.54-7.47, 2.60-7.38  
 TM1-TM7: 1.36-7.36, 1.52-7.58, 1.53-7.58, 1.56-7.58, 1.56-7.61, 1.57-7.58

(b) Class C: MGLU1, MGLU2

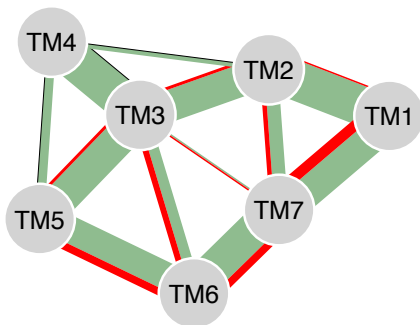

TM2-TM3: 2.50-3.36, 2.57-3.36  
 TM3-TM5: 3.43-5.50, 3.50-5.62  
 TM3-TM6: 3.43-6.45, 3.50-6.38, 3.50-6.42, 3.53-6.34  
 TM3-TM7: 3.46-7.49  
 TM5-TM6: 5.44-6.59, 5.47-6.51, 5.50-6.48, 5.58-6.45, 5.62-6.42  
 TM6-TM7: 6.33-7.52, 6.36-7.51, 6.40-7.51, 6.47-7.40, 6.50-7.40  
 TM2-TM7: 2.40-7.52, 2.50-7.42, 2.57-7.42  
 TM1-TM2: 1.36-2.60  
 TM1-TM7: 1.31-7.32, 1.35-7.32, 1.35-7.35, 1.38-7.39, 1.52-7.53, 1.56-7.53, 1.57-7.52

(c) Class F: SMO
