# Supplementary material for: Structure-Based Sequence Alignment of the Transmembrane Domains of All Human GPCRs: Phylogenetic, Structural and Functional Implications
Source: PubMed Central journal article supplement (PMC4814114; doi:10.1371/journal.pcbi.1004805), 2016-03-30

RMSD of helices after best rigid body move

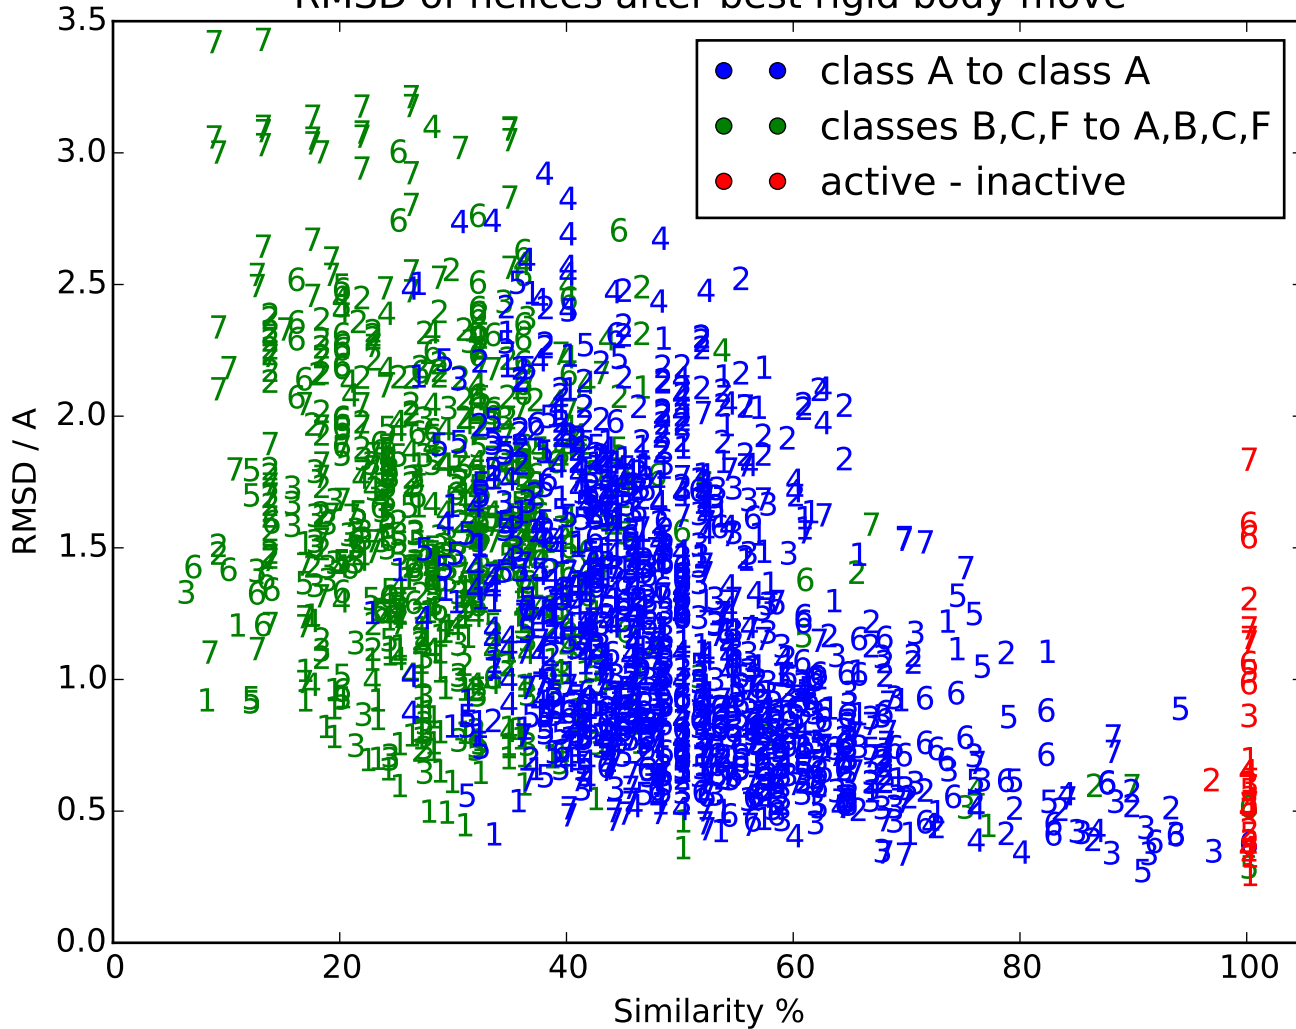

Supplement: pcbi.1004805.s014.pdf [file pcbi.1004805.s014.pdf]
